# Supplementary material
Source: MDPI journal article supplement (https://www.mdpi.com/2073-4344/9/1/3)
Supplement: s1 [file s1]

## Supporting information

### De-Ethylation and Cleavage of Rhodamine B by a Zirconium Phosphate/Silver Bromide Composite Photocatalyst

Monica Pica, Silvia Calzuola, Anna Donnadio, Pier Luigi Gentili, Morena Nocchetti and Mario  
Casciola

(A)

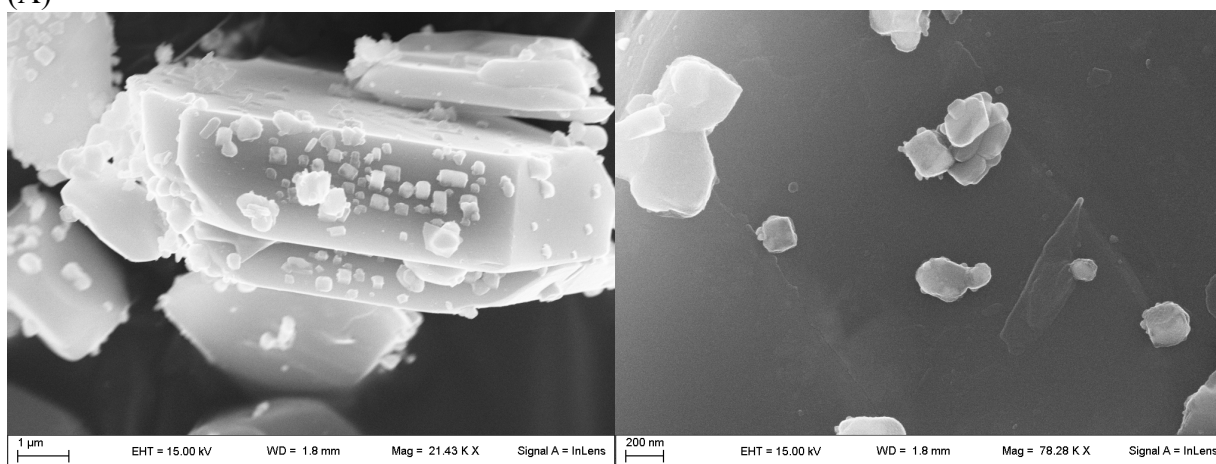

(B)

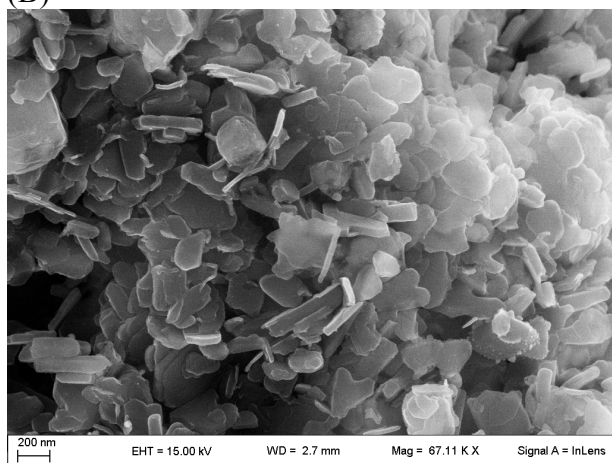

**Figure S1.** SEM pictures of (A) microcrystalline ZrP/AgCl at different magnifications and (B) nanocrystalline ZrP/AgCl (unpublished images).
